# Supplementary material for: Phosphorus-containing polymers synthesised via nitroxide-mediated polymerisation and their grafting on chitosan by grafting to and grafting from approaches
Source: Royal Society of Chemistry journal article supplement (doi:10.1039/d0py00517g), 2020-01-01
Supplement: d0py00517g1.pdf [file d0py00517g1.pdf]

## Phosphorus-containing polymers synthesised via nitroxide-mediated polymerisation and their grafting on chitosan by grafting to and grafting from approaches

Xavier Solimando,<sup>a,b</sup> Emily Kennedy,<sup>b</sup> Ghislain David,<sup>c</sup> Pascale Champagne<sup>\*a</sup> and Michael F. Cunningham<sup>\*b</sup>

<sup>a</sup> Department of Civil Engineering, Queen's University, 58 University Avenue, Kingston, Canada

<sup>b</sup> Department of Chemical Engineering, Queen's University, 19 Division Street, Kingston, Canada

<sup>c</sup> Institut Charles Gerhardt Montpellier, place Eugène Bataillon, Montpellier, France

\* michael.cunningham@queensu.ca

\* pascale.champagne@queensu.ca

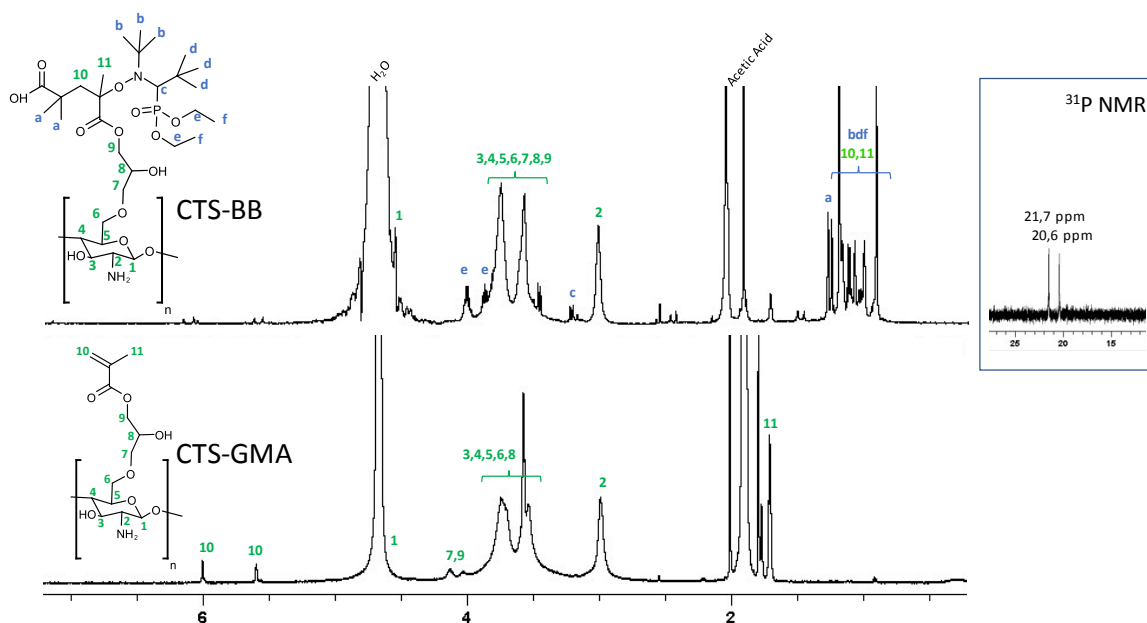

Fig. S1 – <sup>1</sup>H NMR (0.4 M acetic acid in D<sub>2</sub>O) spectra of CTS modified with GMA (bottom) and BB (top).

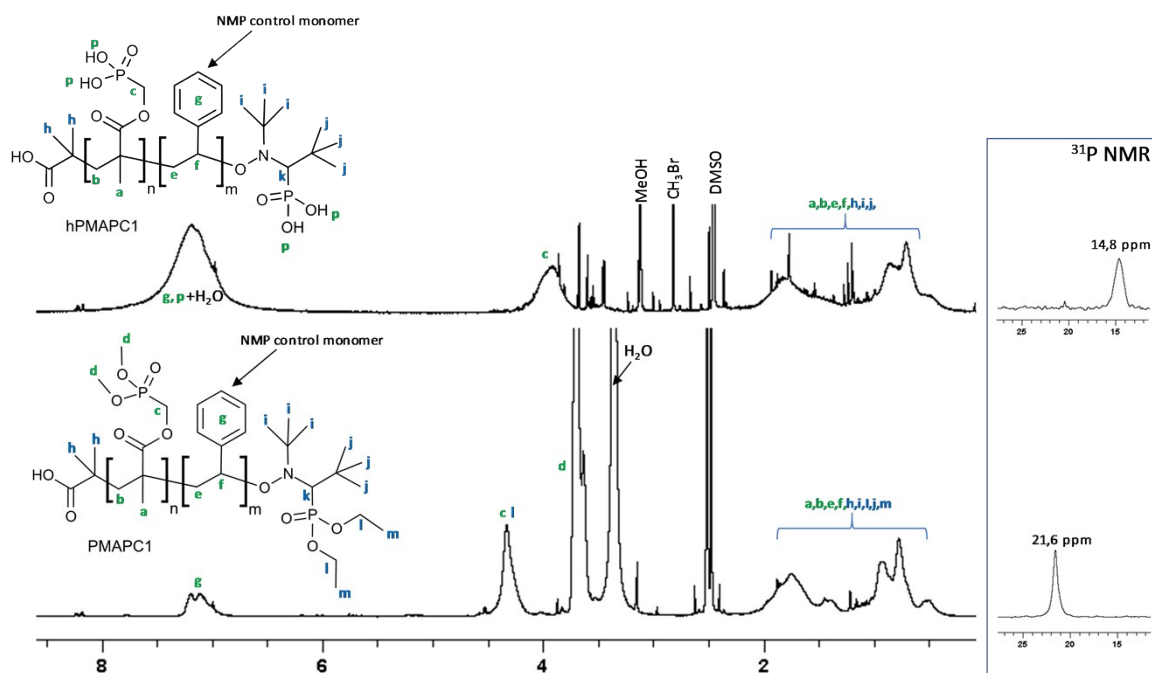

Fig. S2 –  $^1\text{H}$  and  $^{31}\text{P}$  NMR (DMSO- $d_6$ ) spectra of PMAPC1 before (bottom) and after (top) deprotection of phosphonic acid groups.

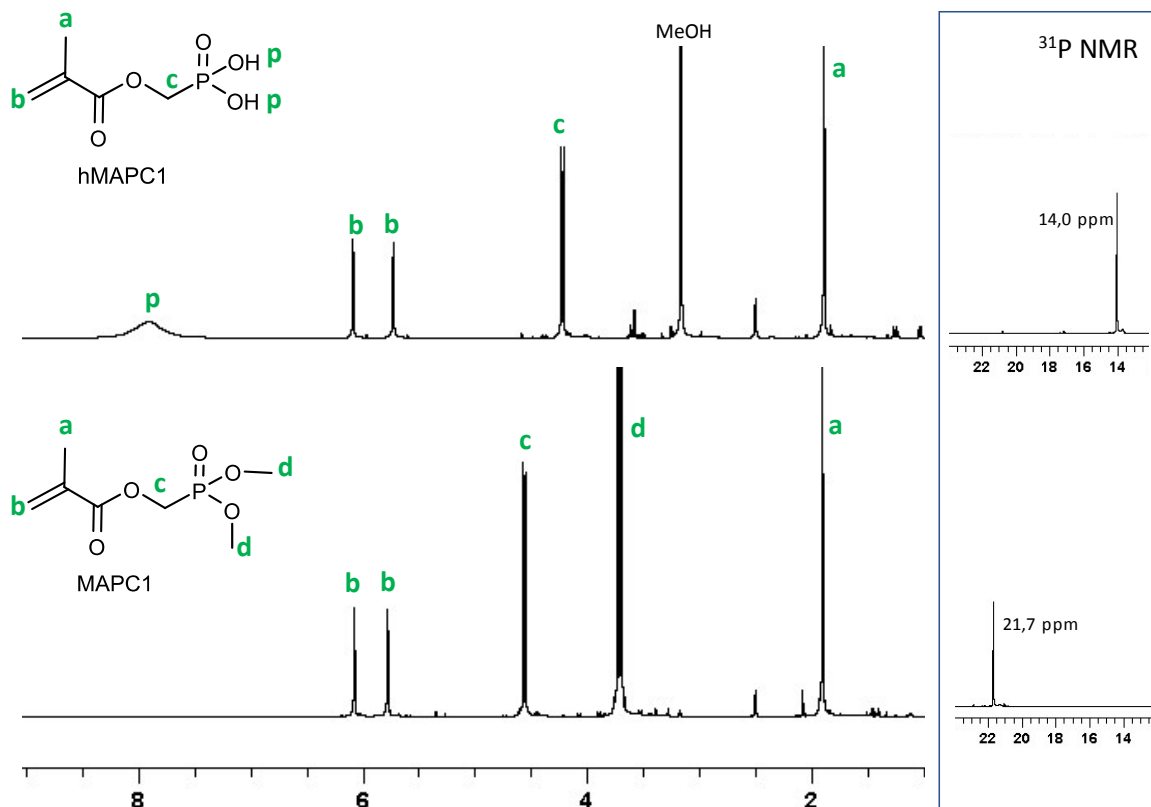

Fig. S3 –  $^1\text{H}$  and  $^{31}\text{P}$  NMR (DMSO- $d_6$ ) spectra of MAPC1 monomer before (bottom) and after (top) deprotection of phosphonic acid groups.
